# Supplementary material for: Interzeolite conversion of zeolite MCM-49 into zeolite ZSM-35 in cyclohexylamine–hexamethyleneimine–Na2O–H2O containing systems
Source: Royal Society of Chemistry journal article supplement (doi:10.1039/c3nj01532g), 2014-01-01
Supplement: c3nj01532g1.pdf [file c3nj01532g1.pdf]

Electronic Supplementary Information (ESI) for New Journal of Chemistry

This journal is © The Royal Society of Chemistry 2014

### Interzeolite conversion of zeolite MCM-49 into zeolite ZSM-35 in Cyclohexylamine-Hexamethyleneimine- $\text{Na}_2\text{O}$ - $\text{H}_2\text{O}$ containing systems

Sujuan Xie,<sup>\*a</sup> Shenglin Liu,<sup>a</sup> Ningning Gao,<sup>a,b</sup> Xiujie Li,<sup>a</sup> Yang Gao,<sup>a</sup> Kefeng Liu<sup>c</sup> and Longya Xu<sup>\*a</sup>

<sup>a</sup> Dalian Institute of Chemical Physics, Chinese Academy of Sciences, Dalian 116023, China

<sup>b</sup> University of Chinese Academy of Sciences, Beijing 100049, China

<sup>c</sup> Petrochemical Research Institute of Petrochina Company Limited, Beijing 100029, China

E-mail: [sjxie@dicp.ac.cn](mailto:sjxie@dicp.ac.cn), [lyxu@dicp.ac.cn](mailto:lyxu@dicp.ac.cn), Fax: +86-411-84379279

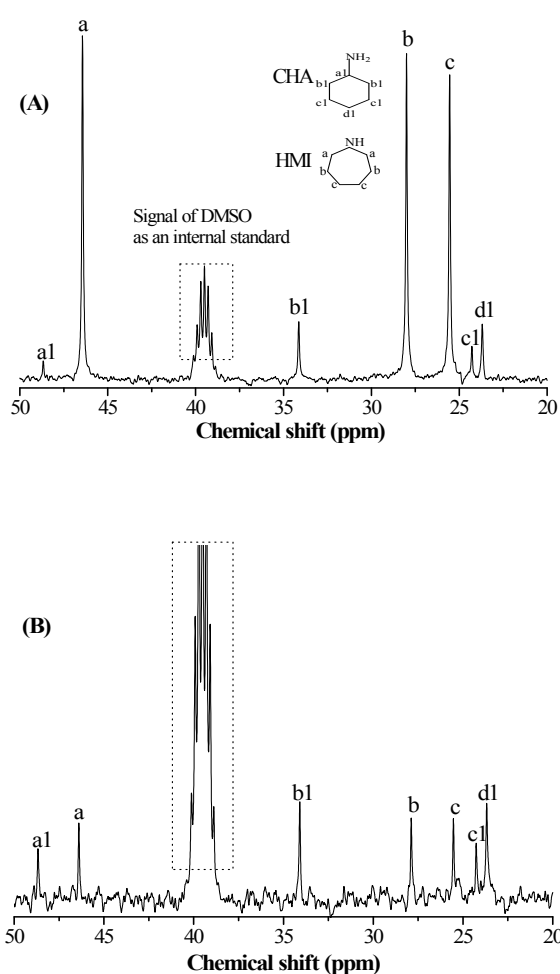

Fig. S1.  $^{13}\text{C}$  NMR spectra of the mother liquor: (A) SB-1-L and (B) SC-1-L.

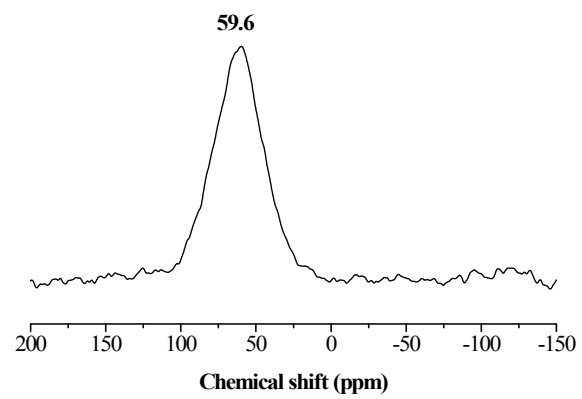

**Fig. S2.**  $^{27}\text{Al}$  NMR spectra of SF-1-L.
